# Supplementary material for: Mechanistic model for epigenetic maintenance by methyl-CpG-binding domain proteins
Source: PubMed Central journal article supplement — bioRxiv. 2024 Sep 24:2024.09.22.614380. Preprint. [Version 1] doi: 10.1101/2024.09.22.614380 (PMC11463468; doi:10.1101/2024.09.22.614380), 2024-09-24
Supplement: media-1.pdf [file media-1.pdf]

# Supplementary Information

## Mechanistic model for epigenetic maintenance by methyl-CpG-binding domain proteins

Liuhan Dai<sup>1,2</sup>, Alexander Johnson-Buck<sup>1</sup> & Nils G. Walter<sup>1,2\*</sup>

<sup>1</sup>Single Molecule Analysis Group, Department of Chemistry, University of Michigan, Ann Arbor, MI 48109, USA

<sup>2</sup>Center for RNA Biomedicine, University of Michigan, Ann Arbor, MI 48109, USA

Corresponding authors

\*E-mail: [nwalter@umich.edu](mailto:nwalter@umich.edu)

The manuscript was written based on contributions from all authors.

All authors have given approval to the final version of the manuscript.

**Supplementary Table 1.** DNA oligonucleotide names, sequences, and descriptions. All sequences are listed 5'-to-3'.

| Name           | Sequences                                                                                                | Description                                                                                                                                      |
|----------------|----------------------------------------------------------------------------------------------------------|--------------------------------------------------------------------------------------------------------------------------------------------------|
| <b>Cloning</b> |                                                                                                          |                                                                                                                                                  |
| Halo-hMBD-BF   | GGAGGTGGAAGCGGTGAA                                                                                       | Forward primer for linearization of backbone plasmid pBD003_mut_VCP (R155H) for constructing Halo-hMBD, directly purchased from IDT              |
| Halo-hMBD-BR   | ATGTATATCTCCTTCTTAAAGTTAA                                                                                | Reverse primer for linearization of backbone plasmid pBD003_mut_VCP (R155H) for constructing Halo-hMBD, directly purchased from IDT              |
| Halo-hMBD-IF   | GAAGGAGATATACATATGGCTGAGGACTGGCTGG                                                                       | Forward primer for PCR amplification of insert hMBD1 MBD from Addgene plasmid #119966 for constructing 81 Halo-hMBD, directly purchased from IDT |
| Halo-hMBD-IR   | ACCGCTTCCACCTCCATGGGCCTTGGGGGCTGG                                                                        | Reverse primer for PCR amplification of insert hMBD1 MBD from Addgene plasmid #119966 for constructing Halo-hMBD, directly purchased from IDT    |
| <b>Target</b>  |                                                                                                          |                                                                                                                                                  |
| M7             | GTCTTCCTGCTGATGCAATC/iMe-dC/GCTAGGT/iMe-dC/G/iMe-dC/GAGTCTC/iMe-dC/GC/iMe-dC/G/iMe-dC/GAGAGGGC/iMe-dC/GG | Fully Methylated 55 nt BCAT1 promoter forward strand, with 7 methyl-CpGs, directly purchased from IDT                                            |
| M4b            | GTCTTCCTGCTGATGCAATCCGCTAGGT /iMe-dC/ G /iMe-dC/GAGTCTC/iMe-dC/GC/iMe-dC/GCGAGAGGGCCGG                   | Methylated 55 nt BCAT1 promoter forward strand, with 4 methyl-CpGs, directly purchased from IDT                                                  |
| M4a            | GTCTTCCTGCTGATGCAATCCGCTAGGT /iMe-dC/ G /iMe-dC/ GAGTCTCCGC /iMe-dC/ G /iMe-dC/GAGAGGGCCGG               | Methylated 55 nt BCAT1 promoter forward strand, with 4 methyl-CpGs, directly purchased from IDT                                                  |
| M3b            | GTCTTCCTGCTGATGCAATCCGCTAGGTCGCGAGTCTC/iMe-dC/GC/iMe-dC/GCGAGAGGGC/iMe-dC/GG                             | Methylated 55 nt BCAT1 promoter forward strand, with 3 methyl-CpGs, directly purchased from IDT                                                  |
| M3a            | GTCTTCCTGCTGATGCAATCCGCTAGGTCGCGAGTCTC/iMe-dC/GC/iMe-dC/G/iMe-dC/GAGAGGGCCGG                             | Methylated 55 nt BCAT1 promoter forward strand, with 3 methyl-CpGs, directly purchased from IDT                                                  |

|     |                                                                           |                                                                                                      |
|-----|---------------------------------------------------------------------------|------------------------------------------------------------------------------------------------------|
| M2c | GTCTTCCTGCTGATGCAATCCGCTAGGTCGCGAGTCTCC<br>GC/iMe-dC/GCGAGAGGGC/iMe-dC/GG | Methylated 55 nt BCAT1 promoter forward strand, with 2 methyl-CpGs, directly purchased from IDT      |
| M2b | GTCTTCCTGCTGATGCAATCCGCTAGGTCGCGAGTCTC/<br>iMe-dC/GCCGCGAGAGGGC/iMe-dC/GG | Methylated 55 nt BCAT1 promoter forward strand, with 2 methyl-CpGs, directly purchased from IDT      |
| M2a | GTCTTCCTGCTGATGCAATCCGCTAGGT/iMe-<br>dC/G/iMe-dC/GAGTCTCCGCCGCGAGAGGGCCGG | Methylated 55 nt BCAT1 promoter forward strand, with 2 methyl-CpGs, directly purchased from IDT      |
| M1b | GTCTTCCTGCTGATGCAATCCGCTAGGTCGCGAGTCTCC<br>GCCGCGAGAGGGC/iMe-dC/GG        | Methylated 55 nt BCAT1 promoter forward strand, with single methyl-CpGs, directly purchased from IDT |
| M1a | GTCTTCCTGCTGATGCAATC/iMe-<br>dC/GCTAGGTCGCGAGTCTCCGCCGCGAGAGGGCCGG        | Methylated 55 nt BCAT1 promoter forward strand, with single methyl-CpGs, directly purchased from IDT |
| M0  | GTCTTCCTGCTGATGCAATCCGCTAGGTCGCGAGTCTCC<br>GCCGCGAGAGGGCCGG               | Unmethylated 55 nt BCAT1 promoter forward strand, directly purchased from IDT                        |

### Auxiliary probes

|      |                                                                                                  |                                                                                                                                                                   |
|------|--------------------------------------------------------------------------------------------------|-------------------------------------------------------------------------------------------------------------------------------------------------------------------|
| A39m | C/iMe-dC/GGCCCTCT/iMe-dC/G/iMe-<br>dC/GG/iMe-dC/GGAGACT/iMe-dC/G/iMe-<br>dC/GACCTAG/iMe-dC/GGATT | Fully methylated auxiliary probe, 39 nt in total, fully complementary to target sequence, with no "branch" motif, with 7 methyl-CpGs, directly purchased from IDT |
| A390 | CTTATCTGTTCCGCCCTCTCGCGGCGGAGACTCGCGAC<br>CTAGCGGATT                                             | 49 nt auxiliary probe, with 39 nt complementary to target sequence, with a 10 nt overhang sequence "CTTATCTGTT", directly purchased from IDT                      |
| A39  | CCGCCCTCTCGCGGCGGAGACTCGCGACCTAGCGGATT                                                           | 39 nt auxiliary probe, fully complementary to target sequence, directly purchased from IDT                                                                        |
| A30  | TCGCGGCGGAGACTCGCGACCTAGCGGAT                                                                    | 30 nt auxiliary probe, fully complementary to target sequence, directly purchased from IDT                                                                        |
| A25  | GCGGAGACTCGCGACCTAGCGGATT                                                                        | 25 nt auxiliary probe, fully complementary to target sequence, directly purchased from IDT                                                                        |
| A17  | TCGCGACCTAGCGGATT                                                                                | 17 nt auxiliary probe, fully complementary to target                                                                                                              |

|                       |                                                                                                          |                                                                                                                                                                                       |
|-----------------------|----------------------------------------------------------------------------------------------------------|---------------------------------------------------------------------------------------------------------------------------------------------------------------------------------------|
| A17O                  | CTTATCTGTTTCGCGACCTAGCGGATT                                                                              | sequence, directly purchased from IDT<br>27 nt auxiliary probe, with 17 nt complementary to target sequence, with a 10 nt overhang sequence "CTTATCTGTT", directly purchased from IDT |
| <b>Capture probes</b> |                                                                                                          |                                                                                                                                                                                       |
| CPO                   | /5Biosg/ATAATTAATAGCATCAGCAGGAAGAC                                                                       | 26 nt 5' biotinylated capture probe, with 16 nt complementary to target sequence, with a 10 nt overhang sequence "ATAATTAATA", directly purchased from IDT                            |
| CP                    | GCATCAGCAGGAAGAC/3BioTEG/                                                                                | 16 nt 3' biotinylated capture probe, fully complementary to target sequence, directly purchased from IDT                                                                              |
| <b>Others</b>         |                                                                                                          |                                                                                                                                                                                       |
| M7_rev                | C/iMe-dC/GGCCCTCT/iMe-dC/G/iMe-dC/GG/iMe-dC/GGAGACT/iMe-dC/G/iMe-dC/GACCTAG/iMe-dC/GGATTGCATCAGCAGGAAGAC | Fully Methylated 55 nt BCAT1 promoter reverse strand, with 7 methyl-CpGs, fully complementary to M7, directly purchased from IDT                                                      |
| M0_rev                | CCGGCCCTCTCGCGGCGGAGACTCGCGACCTAGCGGATT<br>GCATCAGCAGGAAGAC                                              | Unmethylated 55 nt BCAT1 promoter reverse strand, fully complementary to M7, directly purchased from IDT                                                                              |



**Supplementary Table 2.** Parameter sets for trace generation and analysis.

| <b>Trace Generation Parameters</b> |                            |
|------------------------------------|----------------------------|
| use fluctuation map?               | 2 ('N <sub>b+d</sub> map') |
| Stdfactor                          | 5                          |
| start frame                        | 1                          |
| end frame                          | 3000                       |
| edgePx                             | 20                         |
| Percentilecut                      | 0.95                       |
| ROI size (pixels)                  | 5                          |

| <b>Trace Fitting Parameters</b> |       |
|---------------------------------|-------|
| start frame                     | 1     |
| end frame                       | 3000  |
| exposure time (s)               | 0.1   |
| Smoothframes                    | 1     |
| remove_single_frame_events      | FALSE |
| lthresh                         | 1000  |
| SNthresh                        | 2     |

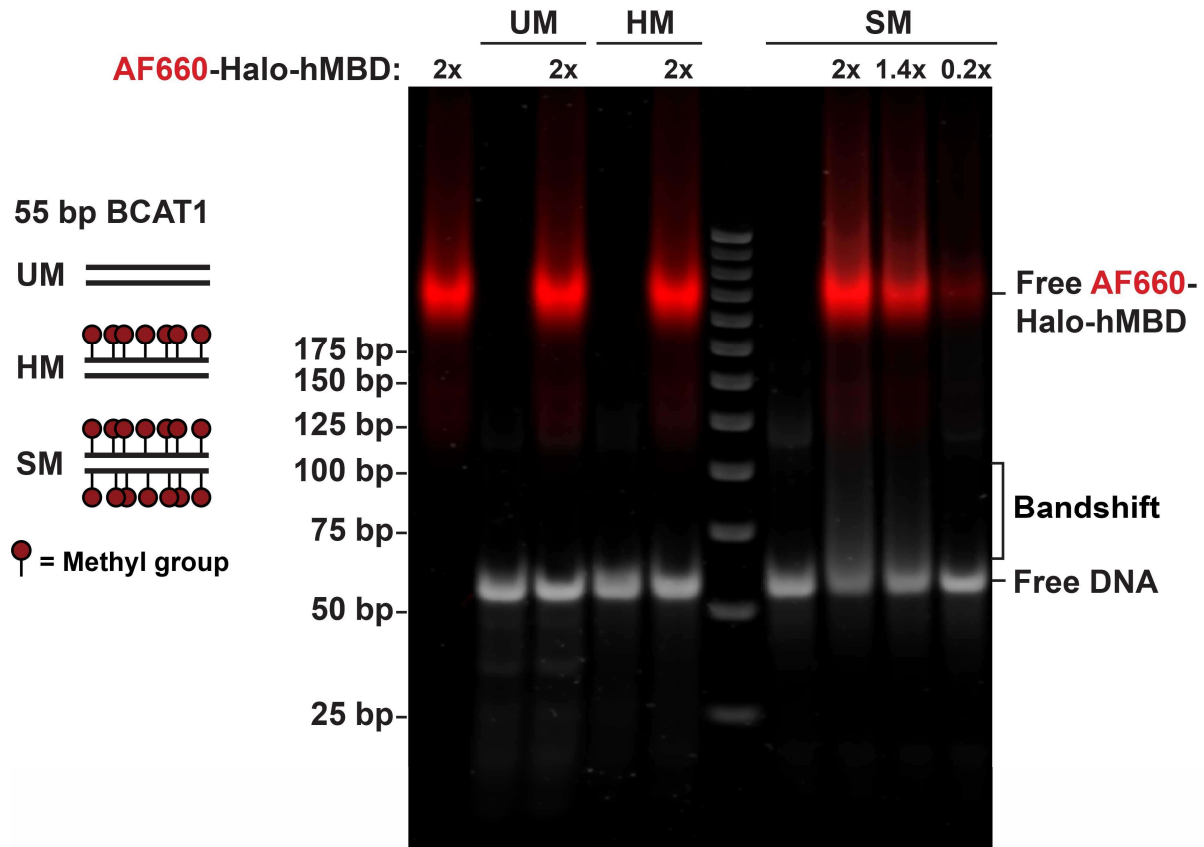

**Supplementary Fig. 1. | EMSA of AF660-Halo-hMBD binding to three types of 55 bp BCAT1 promoter substrates.** SM (symmetrically methylated DNA), HM (hemimethylated DNA), and UM (unmethylated DNA). AF660-Halo-hMBD was mixed with 100 nM DNAs at different molar ratios in 10% glycerol, 50 mM Tris-HCl pH 8.0 at room temperature in dark for 2 h. 5% PAGE was prepared in 50 mM Tris Acetate pH 7.5. Electrophoresis was running in 50 mM Tris Acetate pH 7.5 at 4°C with approximately 15 V/cm for 3 h. Gel was stained with SYBR Gold and visualized using both Cy5 and Cy2 fluorescence on Typhoon Biomolecular Imager.

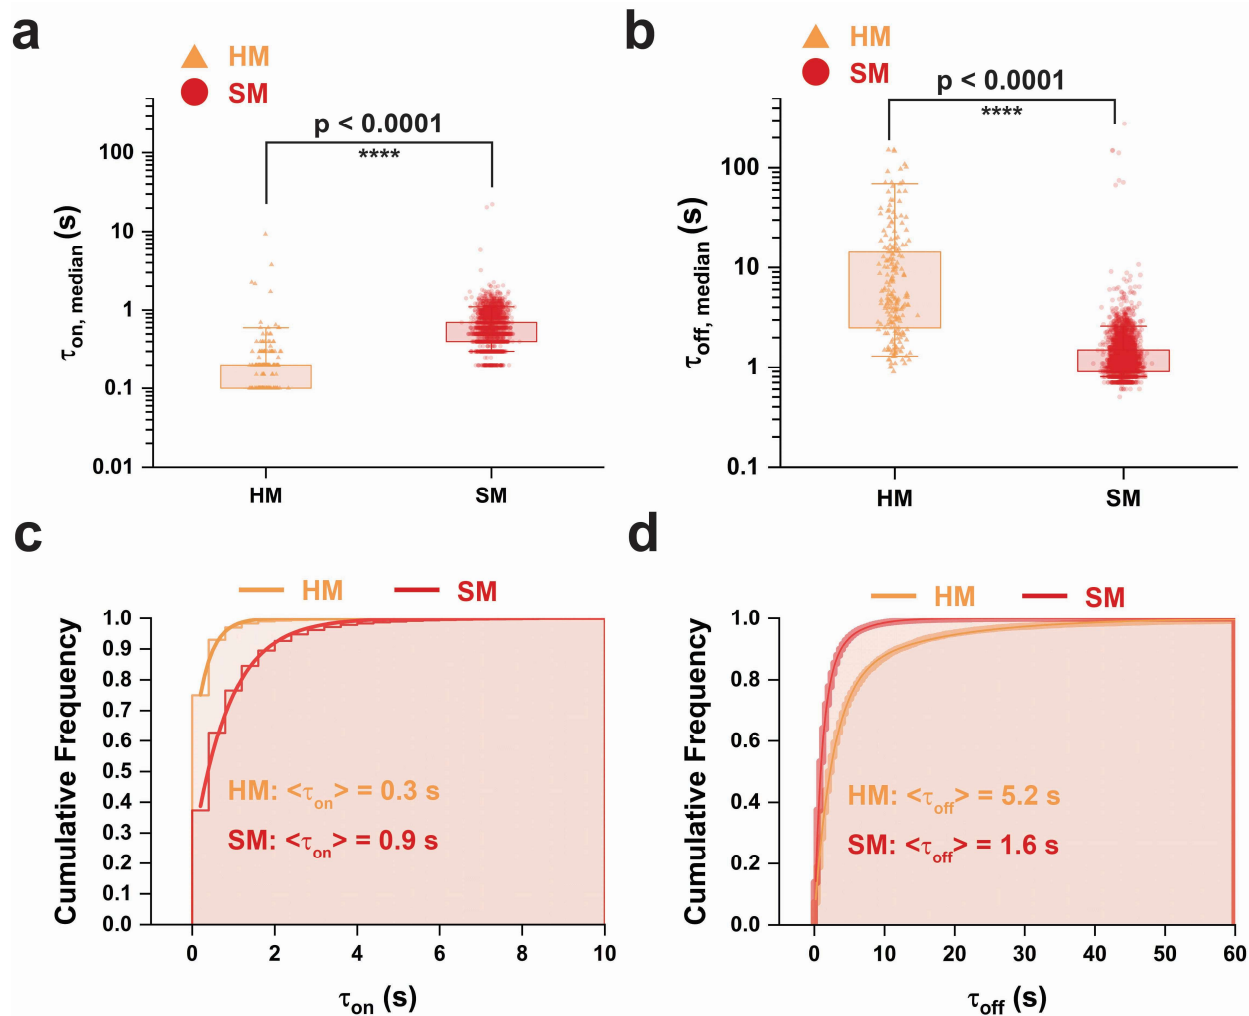

**Supplementary Fig. 2 | Dwell time comparison between SM and HM in Fig. 1.** **a,b** Comparison of  $\tau_{on,median}$  and  $\tau_{off,median}$  distributions respectively between SM and HM. Boxes are drawn from Q1 to Q3 with whiskers from 5% percentile to 95% percentile. P-values are assessed using single-tailed unpaired t-test. **c,d** Cumulative dwell time distributions and their exponential fittings of  $\tau_{on}$  and  $\tau_{off}$  of individual events of detected molecules. Step horizontal lines are cumulative frequency counts and solid curves are fitting curves. In panel c, mean bound time,  $\langle \tau_{on} \rangle$ , is calculated by fitting a single-exponential decay function. In panel d, mean unbound time,  $\langle \tau_{off} \rangle$ , is calculated by fitting a double-exponential decay function and taking the weighted average of individual components.

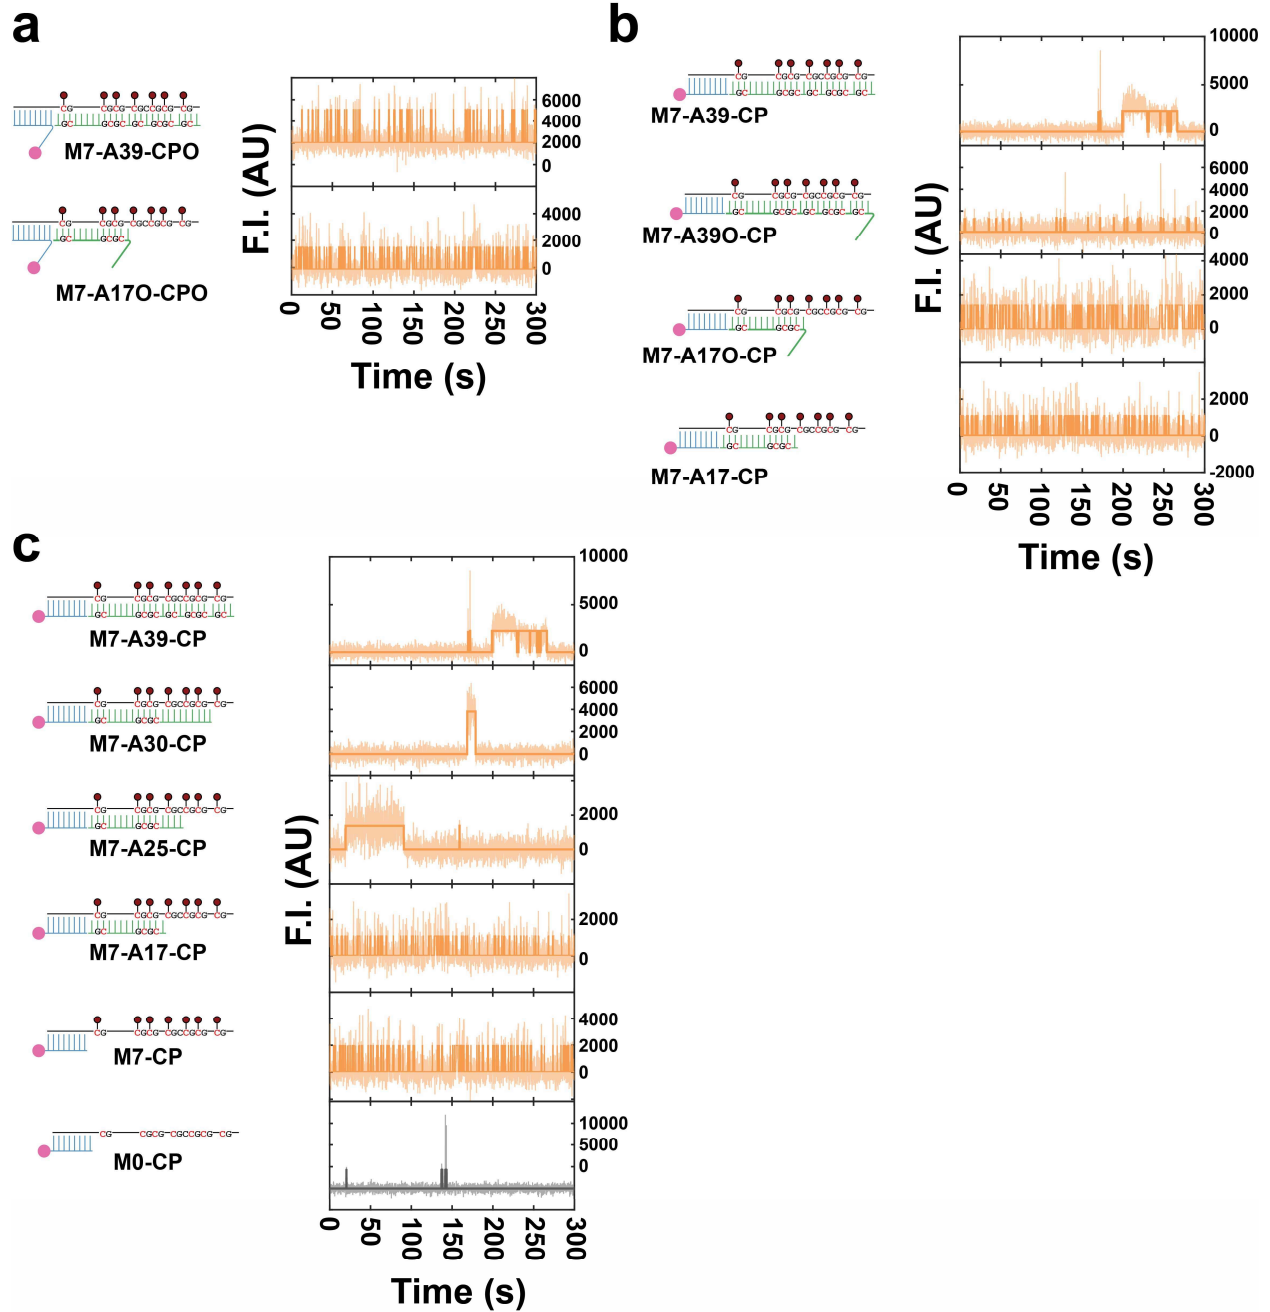

**Supplementary Fig. 3 | Representative intensity-time traces of constructs in Fig. 2.** Semi-transparent lines in the background are raw traces and solid lines are idealized traces by hidden Markov modeling. F.I., fluorescence intensity; AU, arbitrary unit.

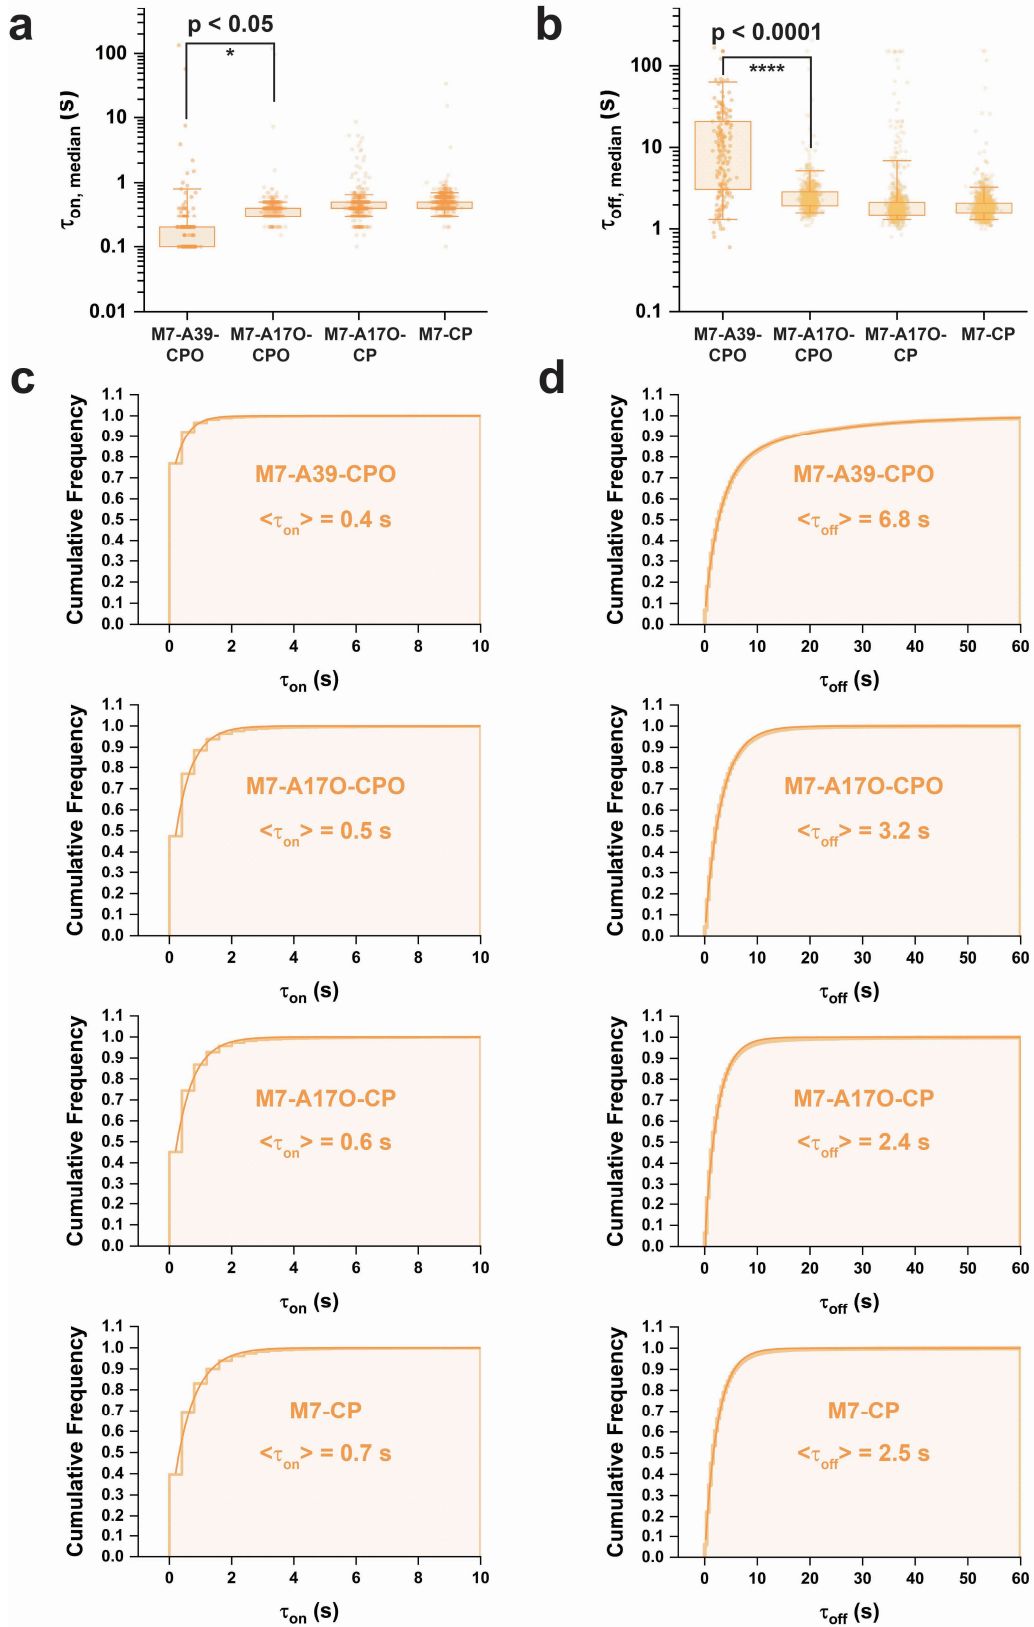

Supplementary Fig. 4 | Dwell time comparison and mean dwell time calculations of M7-A39-CPO, M7-A170-CPO, M7-A170-CP and M7-CP. **a,b** Boxplots of  $\tau_{on,median}$  and  $\tau_{off,median}$

distributions respectively. Boxes are drawn from Q1 to Q3 with whiskers from 5% percentile to 95% percentile. P-values are assessed using single-tailed unpaired t-test. **c,d** Cumulative dwell time distributions and their exponential fittings of  $\tau_{on}$  and  $\tau_{off}$  of individual events of detected molecules. Step horizontal lines are cumulative frequency counts and solid curves are fitting curves. Mean dwell times,  $\langle\tau_{on}\rangle$  and  $\langle\tau_{off}\rangle$ , are calculated by fitting a single-exponential decay function except that  $\langle\tau_{off}\rangle$  of M7-CP is calculated by fitting a double-exponential decay function and taking the weighted average of individual components.

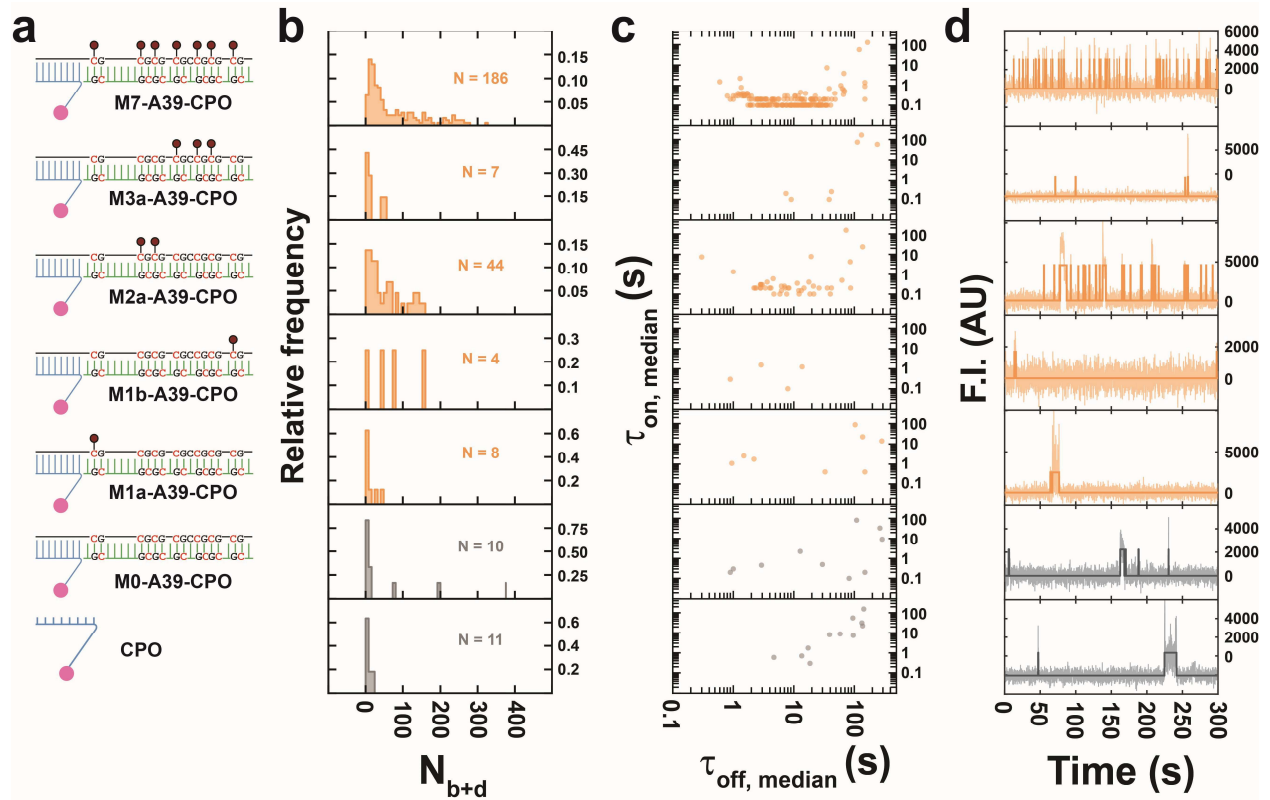

**Supplementary Fig. 5 | Binding kinetics of single internal overhang-containing constructs modulated by clustering of methyl-CpG sites. a** Constructs of M7-A39-CPO, M3a-A39-CPO, M2a-A39-CPO, M1b-A39-CPO, M1a-A39-CPO, M0-A39-CPO and CPO. **b**  $N_{b+d}$  distributions. N, the number of detected molecules of one field of view (FOV). **c** Median dwell time distributions. **d** Representative intensity-time traces. Semi-transparent lines in the background are raw traces and solid lines are idealized traces by hidden Markov modeling. F.I., fluorescence intensity; AU, arbitrary unit.

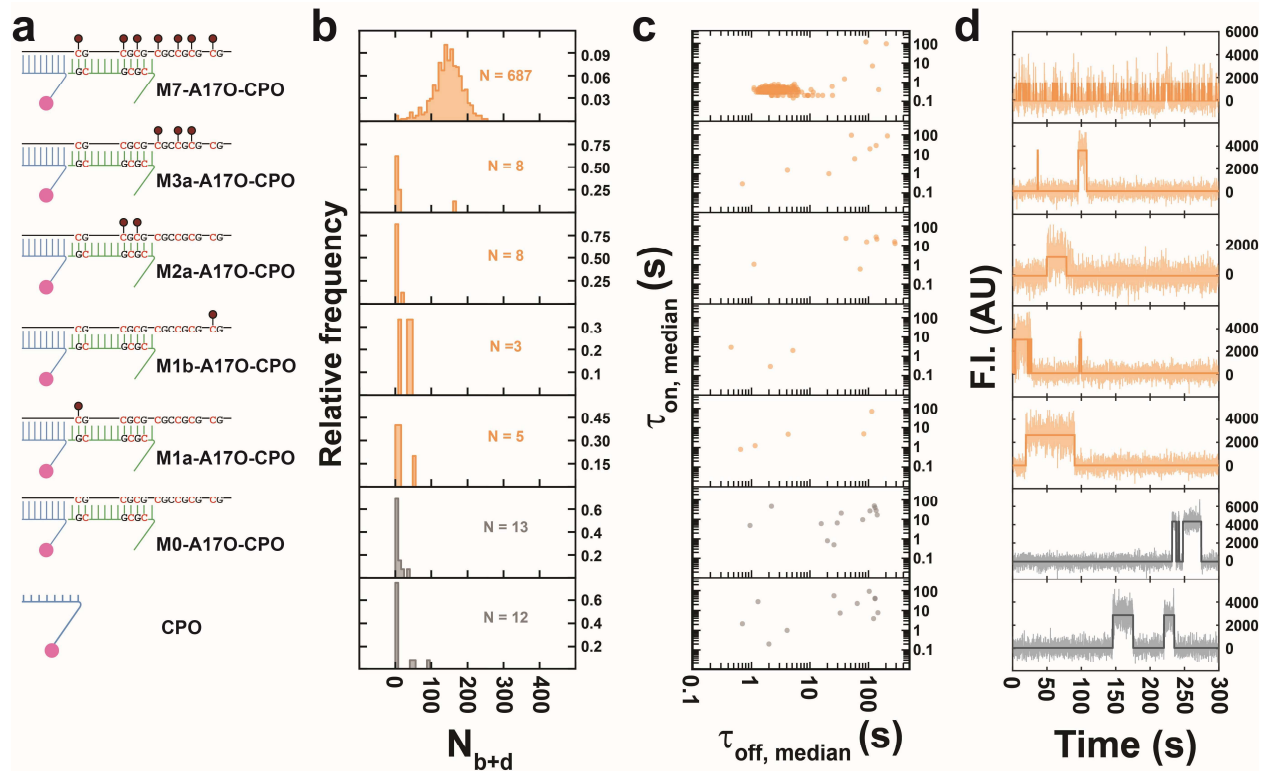

**Supplementary Fig. 6 | Binding kinetics of double overhang-containing constructs modulated by clustering of methyl-CpG sites.** **a** Constructs of M7-A170-CPO, M3a-A170-CPO, M2a-A170-CPO, M1b-A170-CPO, M1a-A170-CPO, M0-A170-CPO and CPO. **b**  $N_{b+d}$  distributions. N, the number of detected molecules of one field of view (FOV). **c** Median dwell time distributions. **d** Representative intensity-time traces. Semi-transparent lines in the background are raw traces and solid lines are idealized traces by hidden Markov modeling. F.I., fluorescence intensity; AU, arbitrary unit.



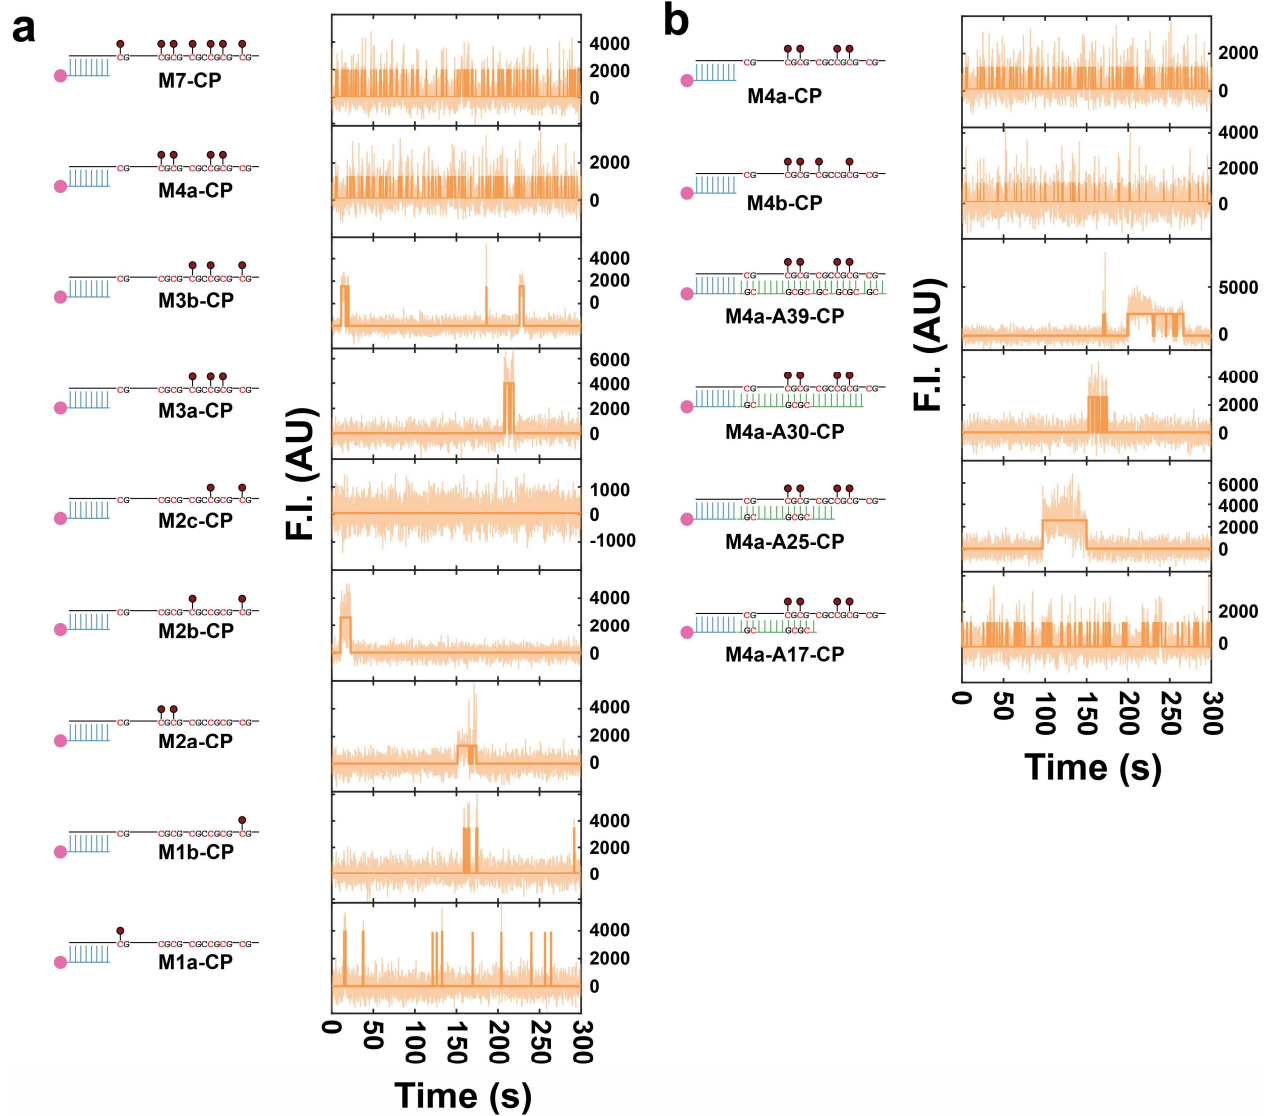

**Supplementary Fig. 7 | Representative intensity-time traces of constructs in Fig. 3. Semi-transparent lines in the background are raw traces and solid lines are idealized traces by hidden Markov modeling. F.I., fluorescence intensity; AU, arbitrary unit.**

**a**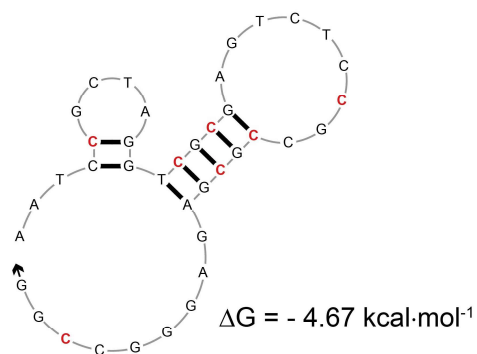**b**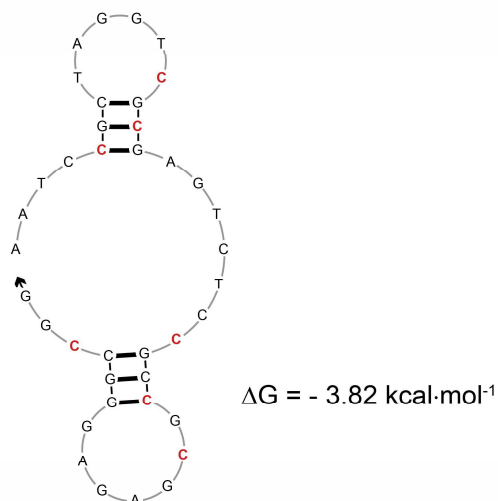**c**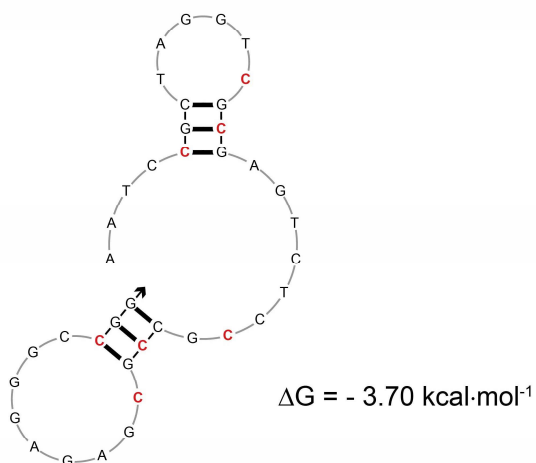**d**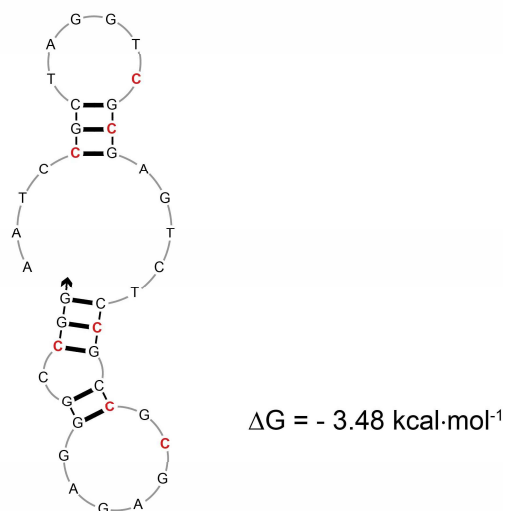

**Supplementary Fig. 8 | Predicted secondary structures and calculated free energy by IDT.**

The top 4 structures are shown here. Input parameters for “HAIRPIN” prediction: Sequence, AATCCGCTAGGTCCGCGAGTCTCCGCCGCGAGAGGGCCGG; Target type, DNA; Oligo Conc, 0.01  $\mu\text{M}$ ;  $\text{Na}^+$  Conc, 20 mM;  $\text{Mg}^{2+}$  Conc, 0 mM; dNTPs Conc, 0 mM; Suboptimality, 50%; Sequence type, Linear; Temperature, 22  $^{\circ}\text{C}$ . Max Foldings, 20; Start position, 0; Stop position, 0.

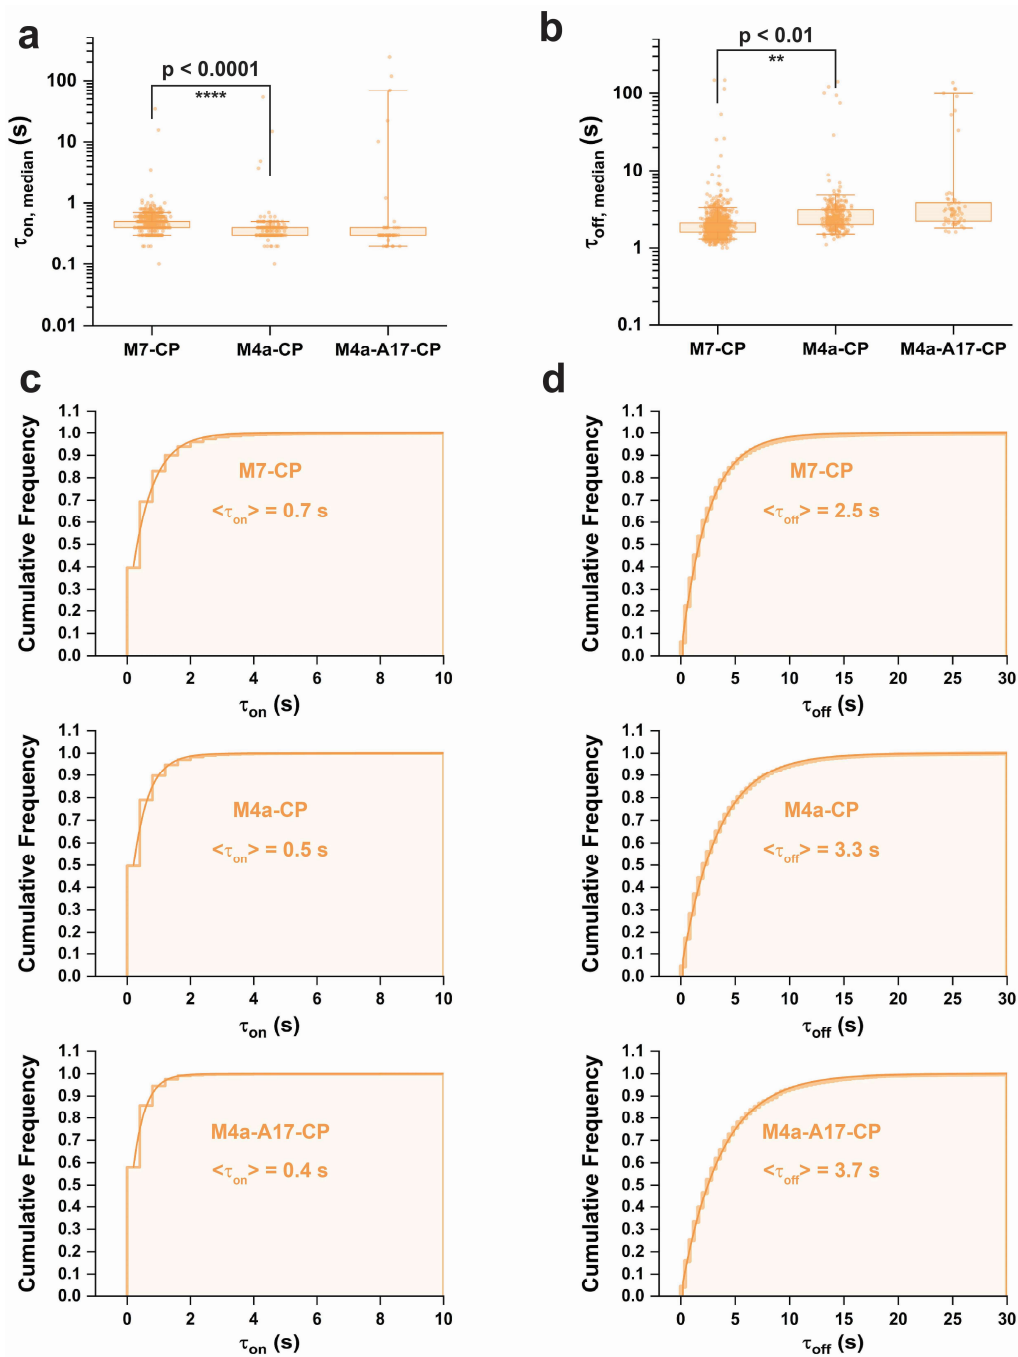

**Supplementary Fig. 9 | Dwell time comparison and mean dwell time calculations of M7-CP, M4a-CP and M4a-A17-CP.** **a,b** Boxplots of  $\tau_{on,median}$  and  $\tau_{off,median}$  distributions respectively. Boxes are drawn from Q1 to Q3 with whiskers from 5% percentile to 95% percentile. For hypothesis testing, the datasets of M4a-CP are 96% winsorized to tolerate interference of outliers. P-values are assessed using single-tailed unpaired t-test. **c,d** Cumulative dwell time distributions and their exponential fittings of  $\tau_{on}$  and  $\tau_{off}$  of individual events of detected molecules. Step horizontal lines are cumulative frequency counts and solid curves are fitting curves. Mean dwell times,  $\langle \tau_{on} \rangle$  and  $\langle \tau_{off} \rangle$ , are calculated by fitting a single-exponential decay function.

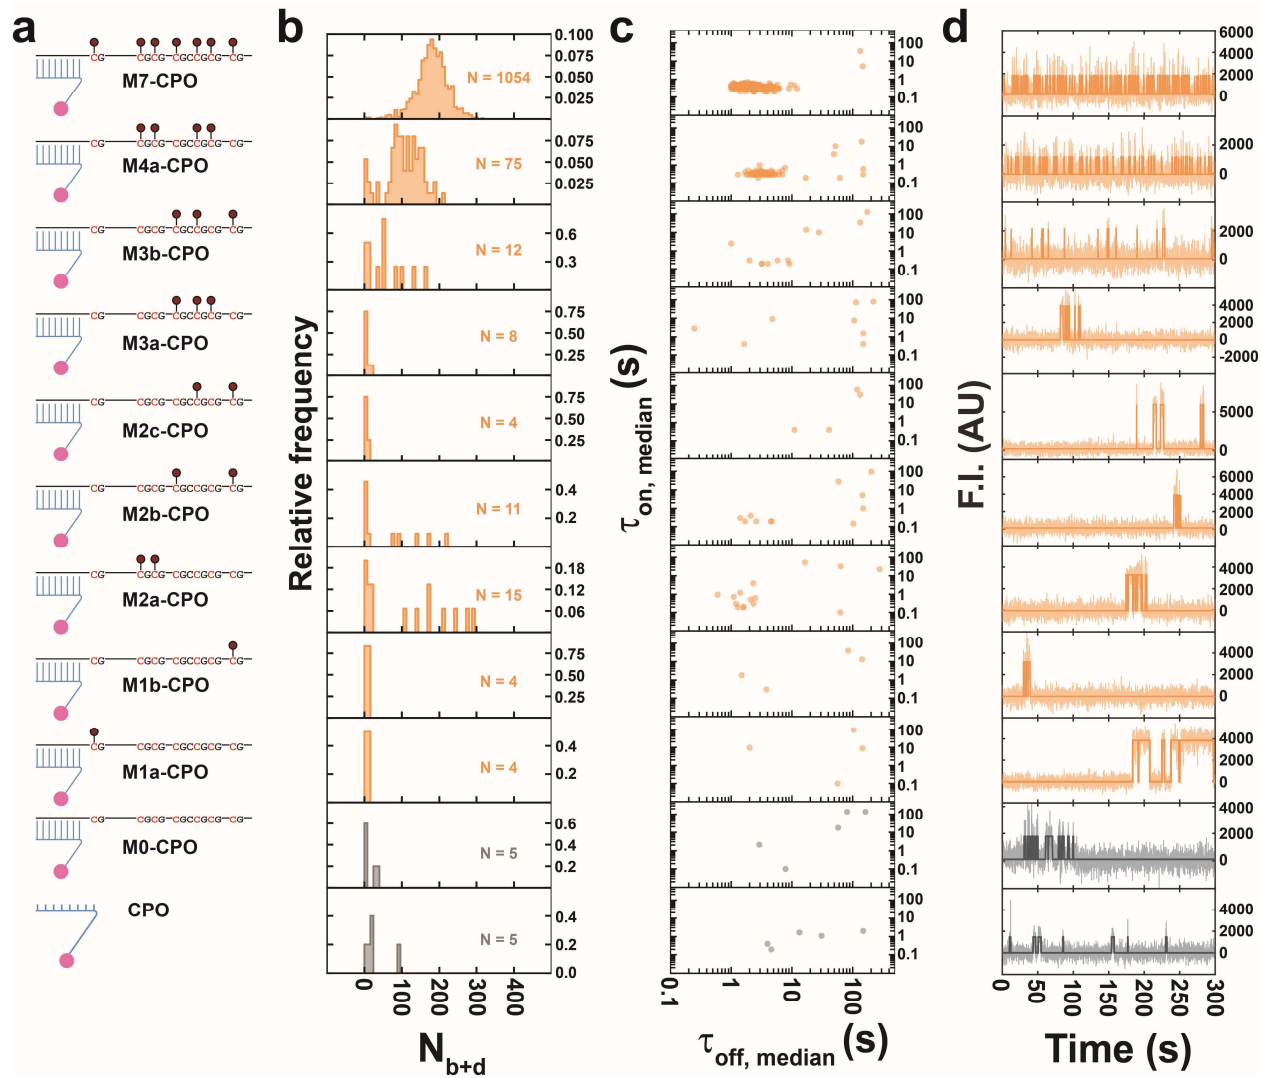

**Supplementary Fig. 10 | Interplay between overhangs and secondary structure. a** Constructs of M7-CPO, M4a-CPO, M3b-CPO, M3a-CPO, M2c-CPO, M2b-CPO, M2a-CPO, M1b-CPO and M1a-CPO, M0-CPO and CPO. **b**  $N_{b+d}$  distributions. N, the number of detected molecules of one field of view (FOV). **c** Median dwell time distributions. **d** Representative intensity-time traces. Semi-transparent lines in the background are raw traces and solid lines are idealized traces by hidden Markov modeling. F.I., fluorescence intensity; AU, arbitrary unit.

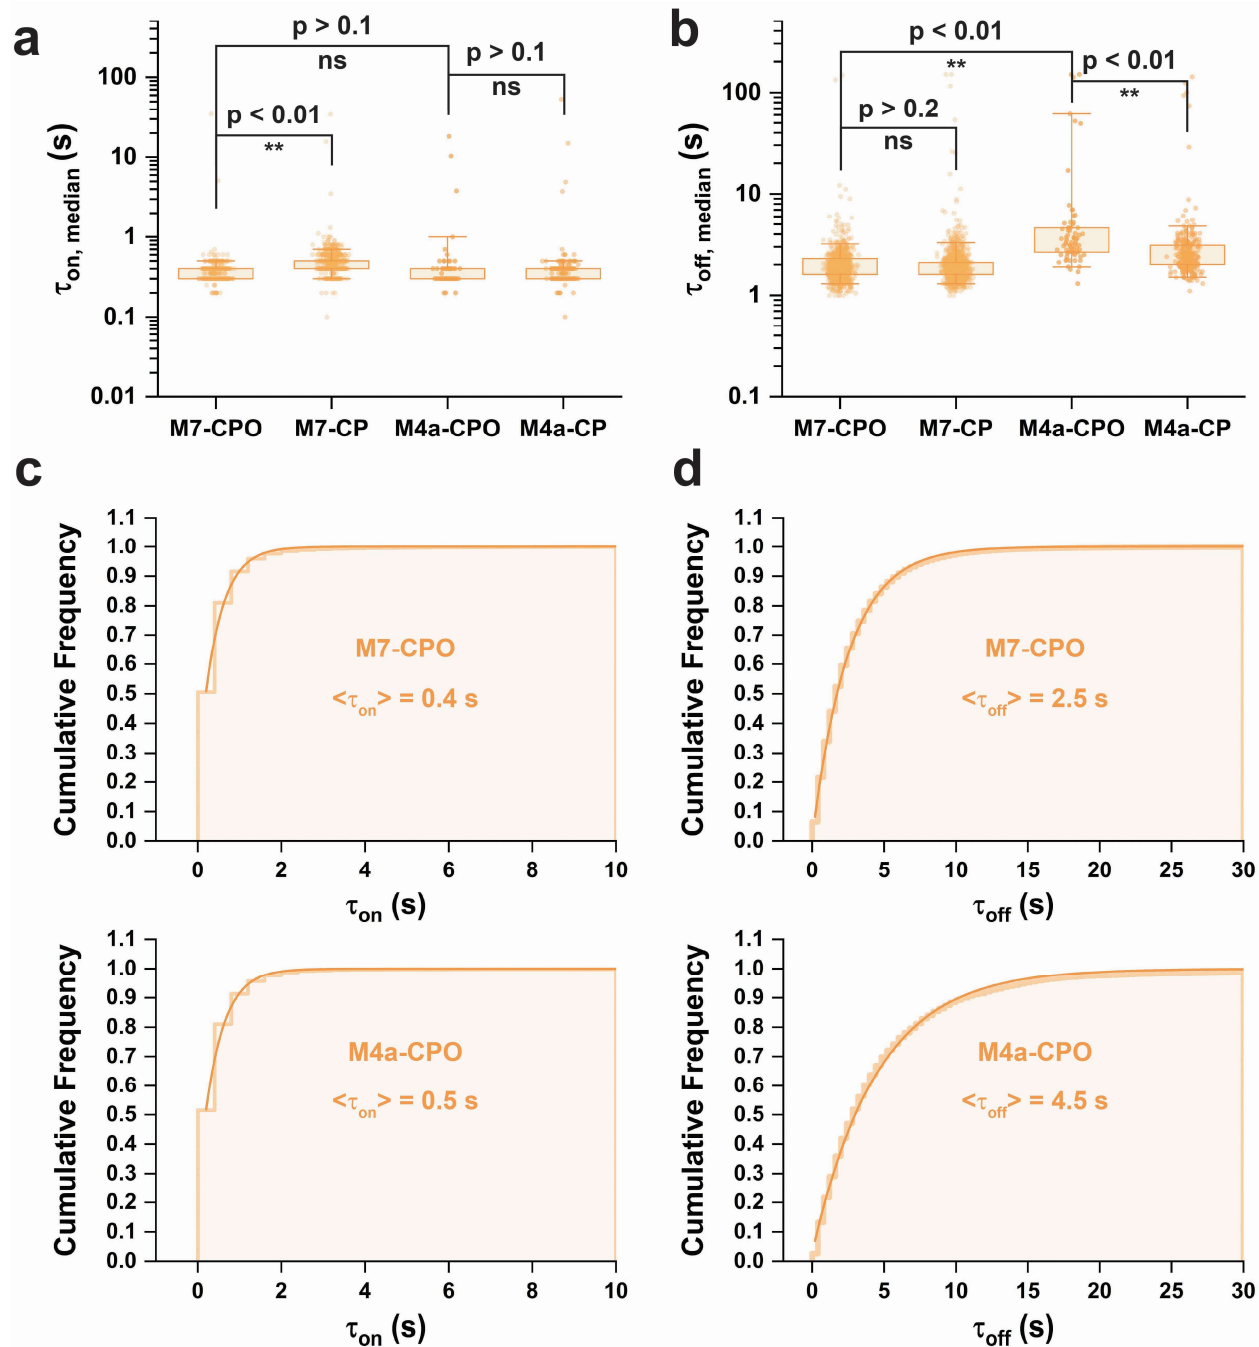

**Supplementary Fig. 11 | Dwell time comparison and mean dwell time calculations of M7-CPO, M7-CP, M4a-CPO and M4a-CP.** **a,b** Boxplots of  $\tau_{on,median}$  and  $\tau_{off,median}$  distributions respectively. Boxes are drawn from Q1 to Q3 with whiskers from 5% percentile to 95% percentile. For hypothesis testing, the datasets of M4a-CPO and M4a-CP are 96% winsorized to tolerate interference of outliers. P-values smaller than 0.05 are assessed using single-tailed unpaired t-test and P-values higher than 0.05 are assessed using two-tailed unpaired t-test. **c,d** Cumulative dwell time distributions and their exponential fittings of  $\tau_{on}$  and  $\tau_{off}$  of individual events of detected molecules. Step horizontal lines are cumulative frequency counts and solid curves are fitting curves. Mean dwell times,  $\langle \tau_{on} \rangle$  and  $\langle \tau_{off} \rangle$ , are calculated by fitting a single-exponential decay function.

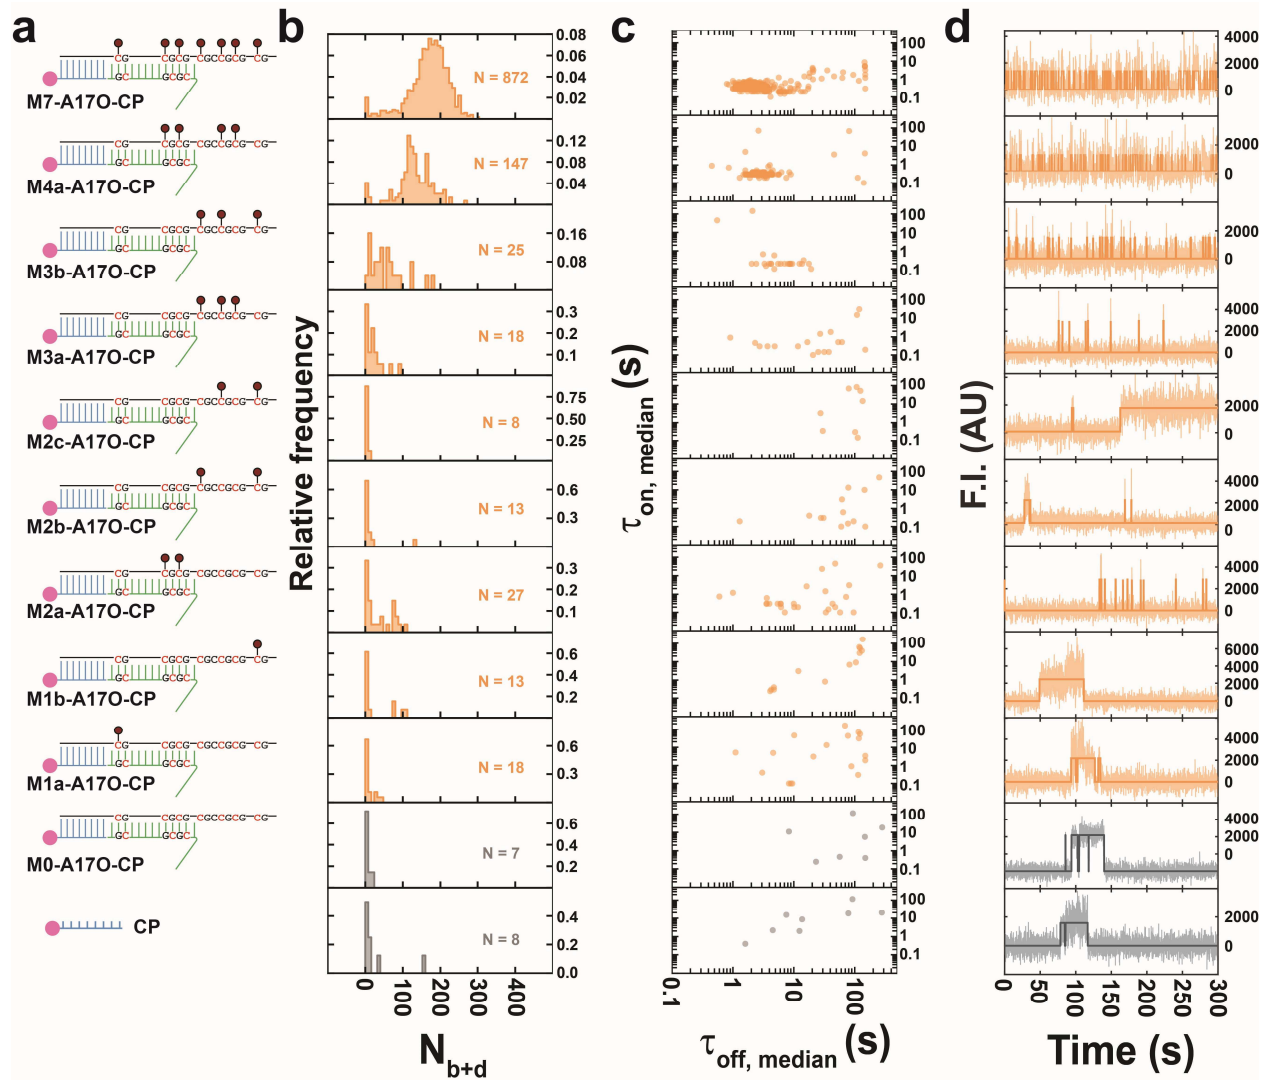

**Supplementary Fig. 12 | Binding kinetics of bifurcating hemimethylated DNA modulated by clustering of methyl-CpG sites. a** Constructs of M7-A170-CP, M4a-A170-CP, M3b--A170-CP, M3a--A170-CP, M2c--A170-CP, M2b--A170-CP, M2a--A170-CP, M1b--A170-CP and M1a-A170-CP, M0-A170-CP and CP. **b**  $N_{b+d}$  distributions. N, the number of detected molecules of one field of view (FOV). **c** Median dwell time distributions. **d** Representative intensity-time traces. Semi-transparent lines in the background are raw traces and solid lines are idealized traces by hidden Markov modeling. F.I., fluorescence intensity; AU, arbitrary unit.

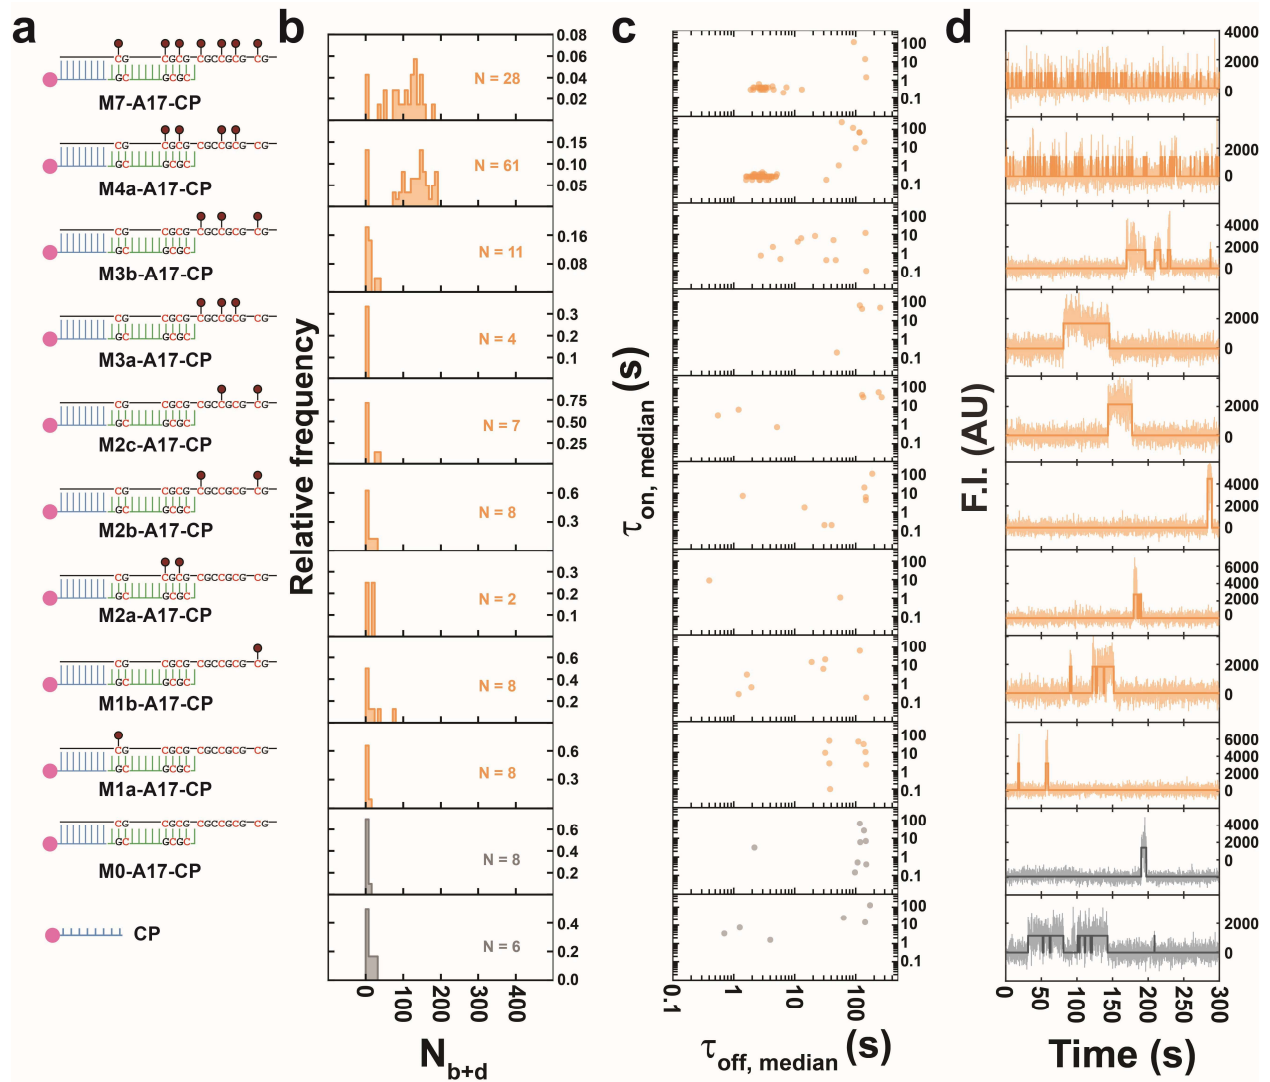

**Supplementary Fig. 13 | Binding kinetics of overhang-free partially exposed hemimethylated DNA modulated by clustering of methyl-CpG sites. a** Constructs of M7-A17-CP, M4a-A17-CP, M3b-A17-CP, M3a-A17-CP, M2c-A17-CP, M2b-A17-CP, M2a-A17-CP, M1b-A17-CP and M1a-A17-CP, M0-A17-CP and CP. **b**  $N_{b+d}$  distributions. N, the number of detected molecules of one field of view (FOV). **c** Median dwell time distributions. **d** Representative intensity-time traces. Semi-transparent lines in the background are raw traces and solid lines are idealized traces by hidden Markov modeling. F.I., fluorescence intensity; AU, arbitrary unit.



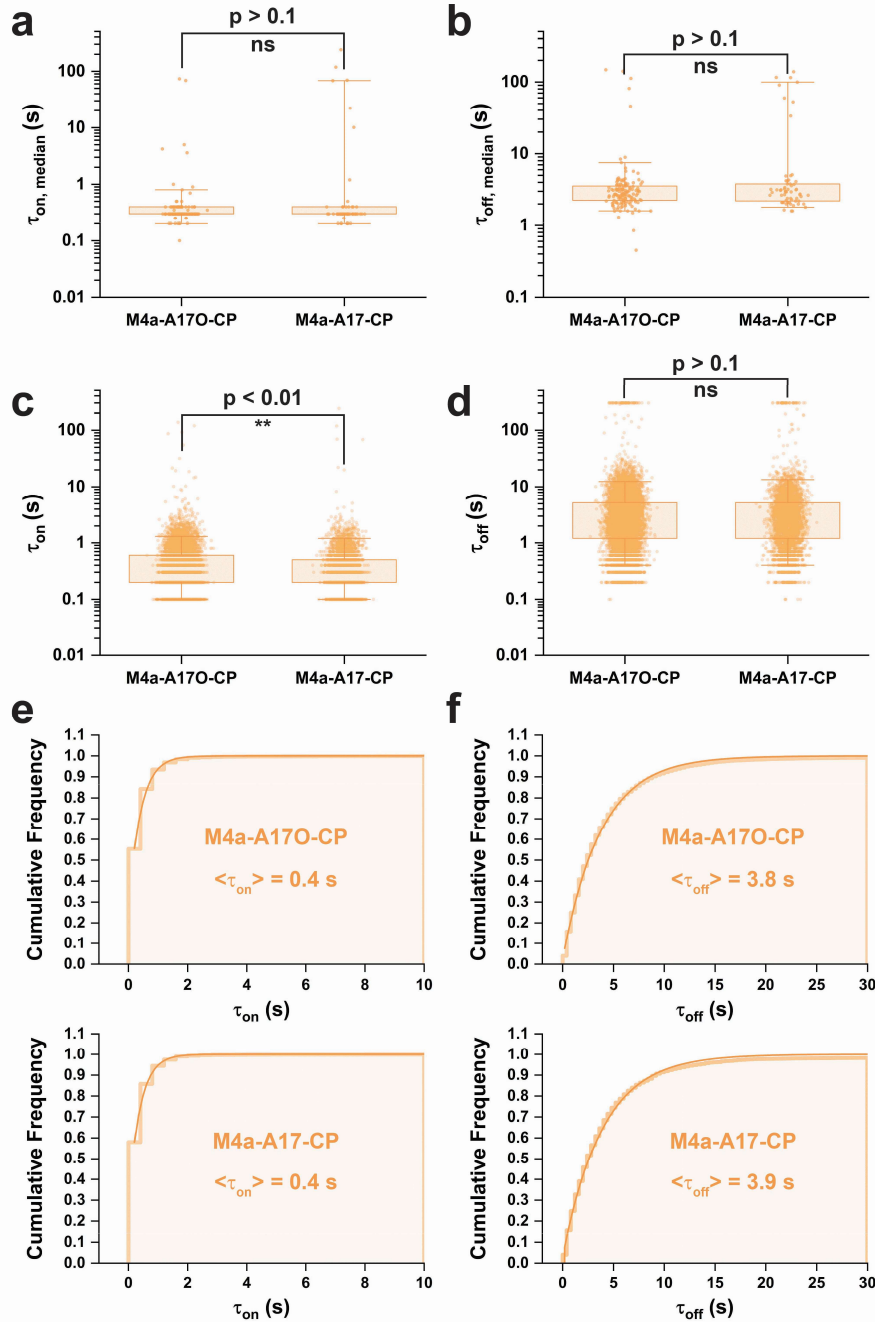

**Supplementary Fig. 14 | Dwell time comparison and mean dwell time calculations of M4a-A17O-CP and M4a-A17-CP.** **a,b** Boxplots of  $\tau_{on,median}$  and  $\tau_{off,median}$  distributions respectively. Boxes are drawn from Q1 to Q3 with whiskers from 5% percentile to 95% percentile. For hypothesis testing, all datasets are 96% winsorized to tolerate interference of outliers. P-values are assessed using two-tailed unpaired t-test. **c,d** Boxplots of  $\tau_{on}$  and  $\tau_{off}$  distributions respectively. Boxes are drawn from Q1 to Q3 with whiskers from 5% percentile to 95% percentile. P-values are assessed using Mann-Whitney U test. **e,f** Cumulative dwell time distributions and their exponential fittings of  $\tau_{on}$  and  $\tau_{off}$  of individual events of detected molecules. Step horizontal lines are cumulative frequency counts and solid curves are fitting curves. Mean dwell times,  $\langle \tau_{on} \rangle$  and  $\langle \tau_{off} \rangle$ , are calculated by fitting a single-exponential decay function.



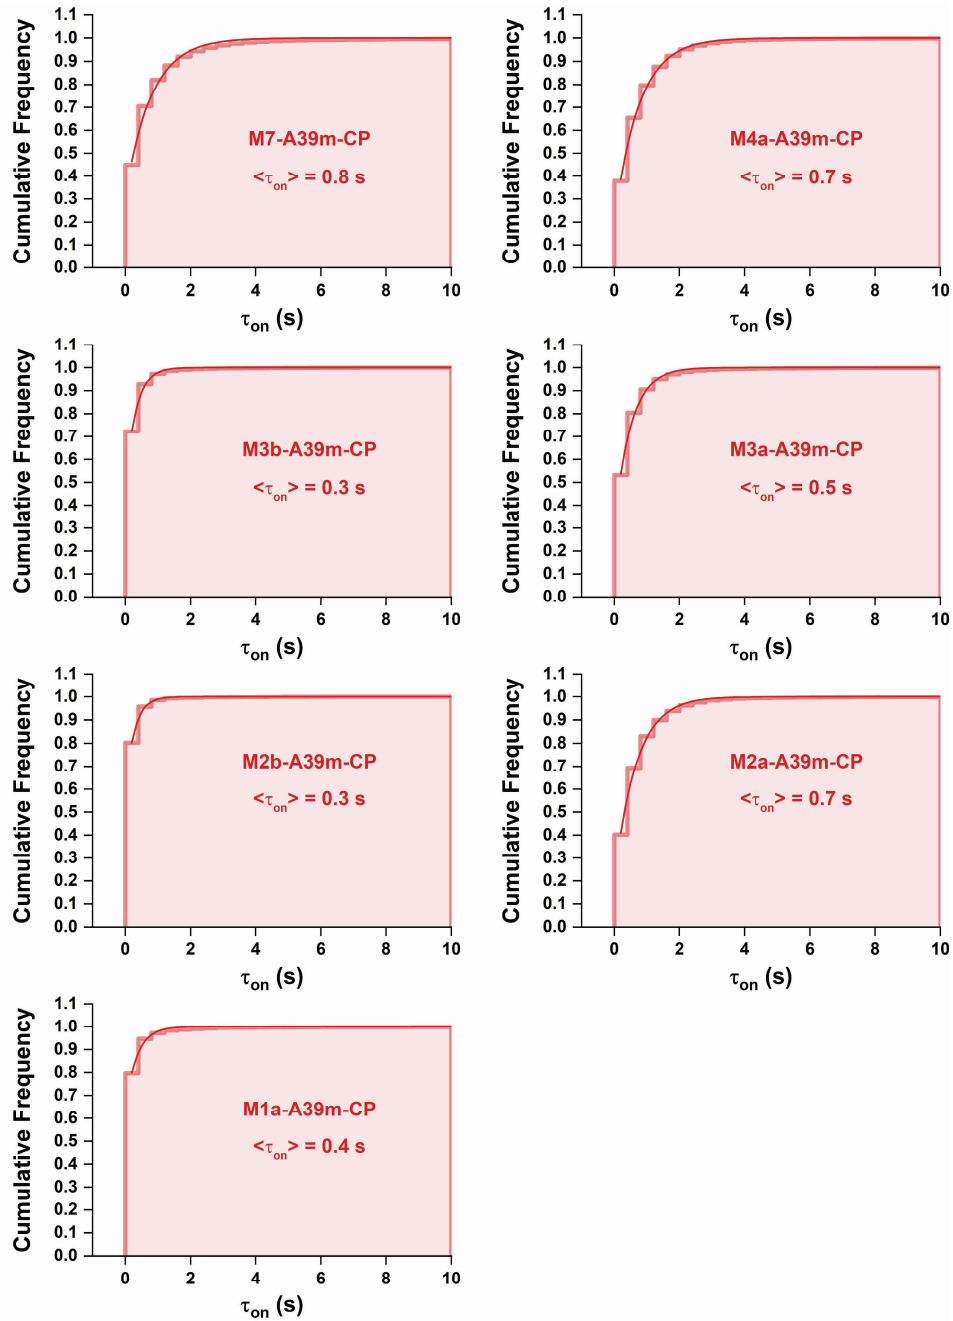

**Supplementary Fig. 15 | Mean bound time calculations of constructs in Fig. 4.** Cumulative dwell time distributions and their exponential fittings of  $\tau_{on}$  of individual events of detected molecules. Step horizontal lines are cumulative frequency counts and solid curves are fitting curves. Mean bound time,  $\langle \tau_{on} \rangle$ , is calculated by fitting a single-exponential decay function.

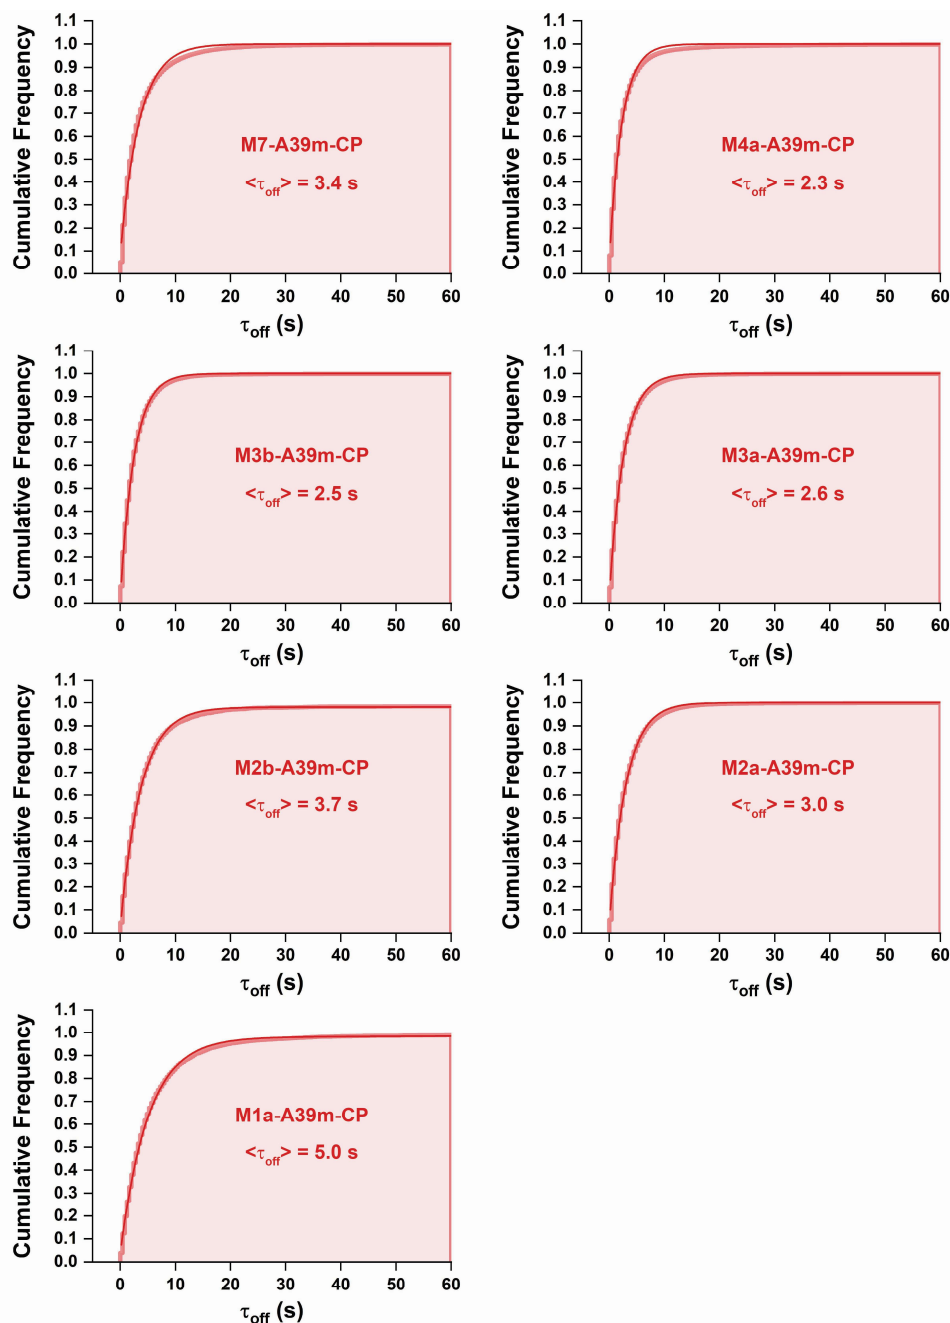

**Supplementary Fig. 16 | Mean unbound time calculations of constructs in Fig. 4.** Cumulative dwell time distributions and their exponential fittings of  $\tau_{off}$  of individual events of detected molecules. Step horizontal lines are cumulative frequency counts and solid curves are fitting curves. Except for M2c-A39m-CP, M2b-A39m-CP and M1a-A39m-CP, mean unbound time,  $\langle \tau_{off} \rangle$ , is calculated by fitting a single-exponential decay function. For M2c-A39m-CP, M2b-A39m-CP and M1a-A39m-CP, mean unbound time,  $\langle \tau_{off} \rangle$ , is calculated by fitting a double-exponential decay function and taking only the primary component since the secondary component is marginal ( $< 5\%$  compared to the primary component) and way too big ( $> 180$  s).
